# Supplementary material for: Synthesis and H2S sensing performance of MoO3/Fe2(MoO4)3 yolk/shell nanostructures
Source: Royal Society of Chemistry journal article supplement (doi:10.1039/c5ra03876f), 2015-01-01
Supplement: c5ra03876f1.pdf [file c5ra03876f1.pdf]

## **Synthesis and H<sub>2</sub>S sensing performance of MoO<sub>3</sub>/Fe<sub>2</sub>(MoO<sub>4</sub>)<sub>3</sub> yolk/shell nanostructures**

Xinming Gao, Chunyan Li\*, Zhuoxun Yin and Yujin Chen\*

*Key Laboratory of In-Fiber Integrated Optics, Ministry of Education, and College of Science, Harbin Engineering University, Harbin 150001, China.*

*Fax: 86-451-82519754; Tel: 86-451-82519754; E-mail: chen yujin@hrbeu.edu.cn and chunyanli@hrbeu.edu.cn*

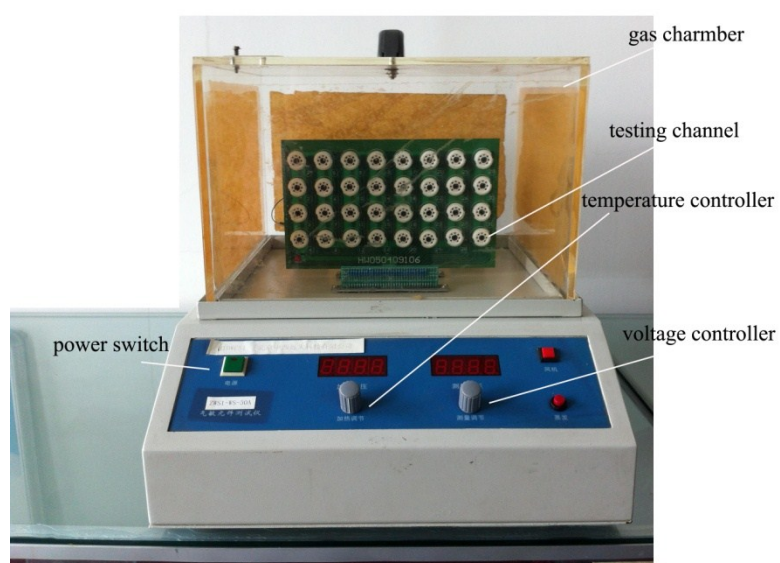

**Figure S1** The measurement set up for gas sensors.

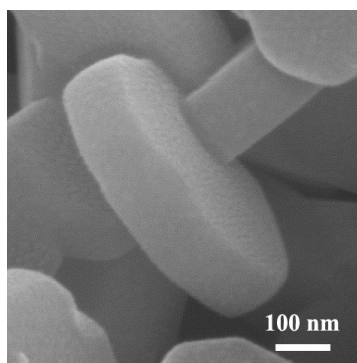

**Figure S2** The high-resolution SEM image of  $\text{MoO}_3$  polyhedrons after the heating of  $\text{MoS}_2$  spheres at  $500^\circ\text{C}$  for 4 h at air atmosphere.

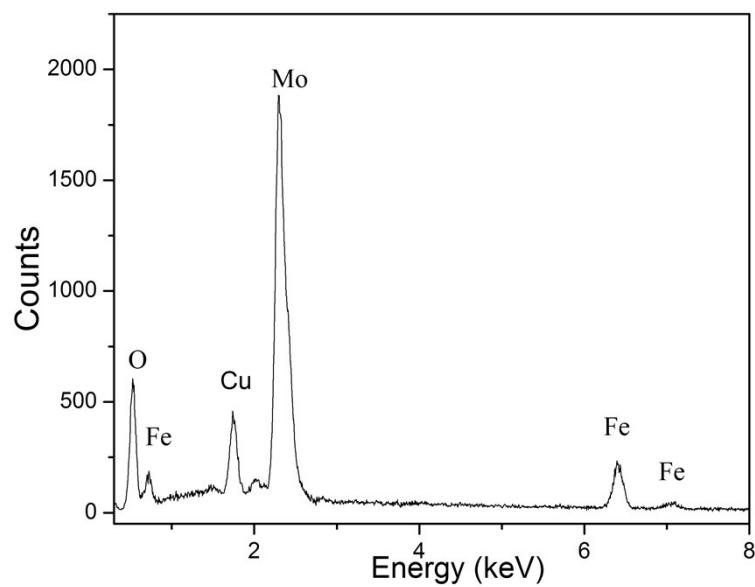

**Figure S3** EDS pattern of  $\text{MoO}_3/\text{Fe}_2(\text{MoO}_4)_3$  yolk/shell nanostructures.

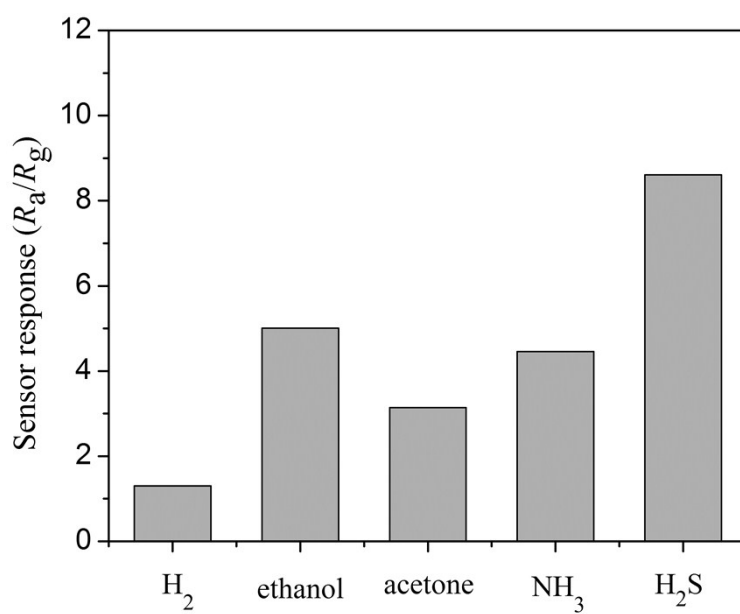

**Figure S4** Sensor responses of  $\text{MoO}_3/\text{Fe}_2(\text{MoO}_4)_3$  yolk/shell nanostructures to different gases with a concentration of 100 ppm.
